# Supplementary material for: The role of TFPI2 hypermethylation in the detection of gastric and colorectal cancer
Source: PubMed Central journal article supplement (PMC5663576; doi:10.18632/oncotarget.21097), 2017-09-20
Supplement: oncotarget-08-84054-s001.pdf [file oncotarget-08-84054-s001.pdf]

# The role of *TFPI2* hypermethylation in the detection of gastric and colorectal cancer

## SUPPLEMENTARY MATERIALS

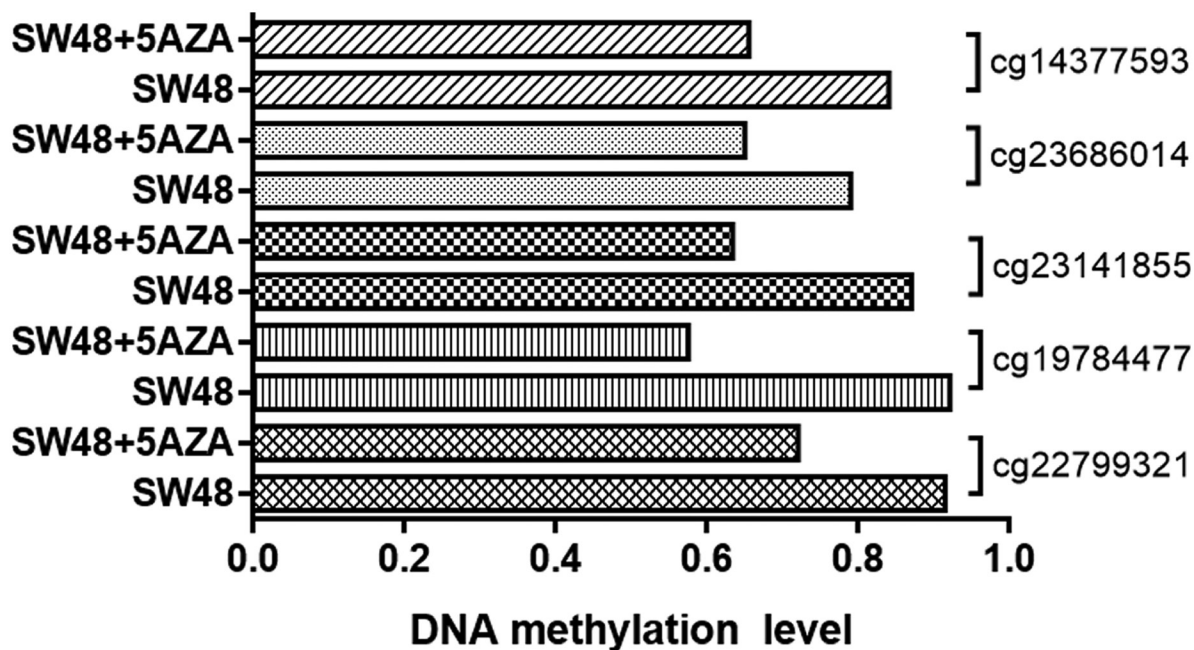

Supplementary Figure 1: The changes of DNA methylation levels in CRC cell line (SW48) with and without 5'-AZA-deoxycytidine treatment from GEO database (accession number GSE32275).
